# Supplementary material for: Unusually selective synthesis of chlorohydrooligosilanes
Source: Royal Society of Chemistry journal article supplement (doi:10.1039/d0cc06506d), 2020-01-01
Supplement: d0cc06506d1.pdf [file d0cc06506d1.pdf]

## Electronic Supplementary Information

### Unusually Selective Synthesis of Chlorohydroooligosilanes

Thomas Lainer,<sup>a</sup> Roland Fischer,<sup>a</sup> Mario Leypold,<sup>a</sup> Michael Holthausen,<sup>b</sup> Odo Wunnicke,<sup>b</sup> Michael Haas<sup>a\*</sup> and Harald Stueger<sup>a\*</sup>

---

<sup>a</sup>*Institute of Inorganic Chemistry, Graz University of Technology  
Stremayrgasse 9/IV, 8010 Graz (Austria).*

<sup>b</sup>*Evonik Creavis GmbH  
Paul-Baumann-Strasse 1, 45772 Marl (Germany).*

## Contents

|                                                                                           |    |
|-------------------------------------------------------------------------------------------|----|
| <b>1. General Considerations</b> .....                                                    | 3  |
| <b>2. Synthetic Procedures</b> .....                                                      | 3  |
| 2.1. Chlorination of Neopentasilane with HCl/AlCl <sub>3</sub> .....                      | 3  |
| <b>Figure S1.</b> <sup>1</sup> H-NMR spectrum .....                                       | 4  |
| <b>Figure S2.</b> bb-decoupled INEPT <sup>29</sup> Si-NMR spectrum. ....                  | 4  |
| 2.2. Partial Hydrogenation of Hexachlorodisilane with <i>i</i> Bu <sub>2</sub> AlH .....  | 5  |
| <b>Figure S3.</b> <sup>1</sup> H-NMR spectrum .....                                       | 5  |
| <b>Figure S4.</b> H-coupled <sup>29</sup> Si-NMR spectrum .....                           | 6  |
| 2.3. Partial Hydrogenation of Octachlorotrisilane with <i>i</i> Bu <sub>2</sub> AlH ..... | 6  |
| <b>Figure S5.</b> <sup>1</sup> H-NMR spectrum .....                                       | 7  |
| <b>Figure S6.</b> H-coupled <sup>29</sup> Si-NMR spectrum .....                           | 7  |
| 2.3 Hydrogenation of Nonachloroisotetrasilane .....                                       | 8  |
| <b>Figure S7.</b> <sup>1</sup> H-NMR spectrum .....                                       | 8  |
| <b>Figure S8.</b> H-coupled <sup>29</sup> Si-NMR spectrum .....                           | 9  |
| 2.4 Hydrogenation of Dodecachloroneopentasilane (DCNPS) .....                             | 9  |
| <b>Figure S9.</b> <sup>1</sup> H-NMR spectrum (fraction 1) .....                          | 10 |
| <b>Figure S10.</b> <sup>1</sup> H-NMR spectrum (fraction 2) .....                         | 10 |
| <b>Figure S11.</b> <sup>1</sup> H-NMR spectrum after distillation .....                   | 11 |
| <b>3. Calculations</b> .....                                                              | 11 |
| 3.1. Computational Methods .....                                                          | 11 |
| 3.2. Computed Reaction Profiles .....                                                     | 12 |
| <b>Figure S12.</b> Computed reaction profiles. ....                                       | 12 |
| <b>4. References</b> .....                                                                | 20 |

## 1. General Considerations

Due to the sensitivity of starting materials and products all experiments were performed under nitrogen atmosphere using standard Schlenk techniques. Solvents were dried using a column solvent purification system.<sup>1</sup> Neopentasilane  $\text{Si}(\text{SiH}_3)_4$ , Dodecachloroneopentasilane  $\text{Si}(\text{SiCl}_3)_4$ , Hexachlorodisilane  $\text{Si}_2\text{Cl}_6$  and Octachlorotrisilane  $\text{Si}_3\text{Cl}_8$  were kindly provided by Evonik Creavis GmbH. Nonachloroisotetrasilane  $\text{Cl}(\text{Si}(\text{SiCl}_3)_3)$  was synthesized according to published procedures.<sup>2</sup> Commercially available chemicals were used without further purification unless otherwise noted.

$^1\text{H}$  (299.95 MHz) and  $^{29}\text{Si}$  (59.59 MHz) NMR spectra were recorded on a Varian INOVA 300 spectrometer in  $\text{C}_6\text{D}_6$  or with a  $\text{D}_2\text{O}$  capillary as an internal lock and referenced versus TMS using the internal  $^2\text{H}$ -lock signal of the solvent.

## 2. Synthetic Procedures

### 2.1. Chlorination of Neopentasilane with $\text{HCl}/\text{AlCl}_3$

1.0 g (6.58 mmol) of  $\text{Si}(\text{SiH}_3)_4$  were dissolved in 15.0 mL of benzene and a catalytic amount of  $\text{AlCl}_3$  was added. The reaction solution was heated to  $70^\circ\text{C}$  and subsequently anhydrous gaseous  $\text{HCl}$  was bubbled through for 15 min. After evaporation of the solvent in vacuo 15 mL of *n*-pentane were added and the precipitated  $\text{AlCl}_3$  was filtered off. Subsequent evaporation of the solvent at room temperature in vacuo followed by recondensation of the resulting crude product at  $80^\circ\text{C}$  and 0.01 mbar afforded 1.2 g of a mixture of  $\text{Si}(\text{SiH}_2\text{Cl})_4$  (85 %) and  $(\text{H}_2\text{ClSi})_3\text{SiH}_3$  (15 %) as determined by integration of the  $^1\text{H}$ -NMR signals as a colorless liquid.

**$\text{Si}(\text{SiH}_2\text{Cl})_4$ :**  $^1\text{H}$  NMR ( $\text{C}_6\text{D}_6$ , TMS, ppm): 4.87 (s,  $\text{SiH}_2\text{Cl}$ ).  $^{29}\text{Si}$  NMR ( $\text{C}_6\text{D}_6$ , TMS, ppm): -125.0 ( $\text{SiSi}_4$ ), -24.5 ( $\text{SiH}_2\text{Cl}$ ).

**$\text{H}_3\text{SiSi}(\text{SiH}_2\text{Cl})_3$ :**  $^1\text{H}$  NMR ( $\text{C}_6\text{D}_6$ , TMS, ppm): 4.86 (s,  $\text{SiH}_2\text{Cl}$ , 6H), 3.37 (s,  $\text{SiH}_3$ , 3H).  $^{29}\text{Si}$  NMR ( $\text{C}_6\text{D}_6$ , TMS, ppm): -130.7 ( $\text{SiSi}_4$ ), -98.5 ( $\text{SiH}_3$ ), -25.9 ( $\text{SiH}_2\text{Cl}$ )

**Figure S1.**  $^1\text{H}$ -NMR spectrum (Si-H region; 300 MHz,  $\text{C}_6\text{D}_6$  solution) of product mixture obtained after chlorination of  $\text{Si}(\text{SiH}_3)_4$  with  $\text{HCl}/\text{AlCl}_3$  (volatile fraction obtained after recondensation of crude product at  $80^\circ\text{C}$  and 0.01 mbar)

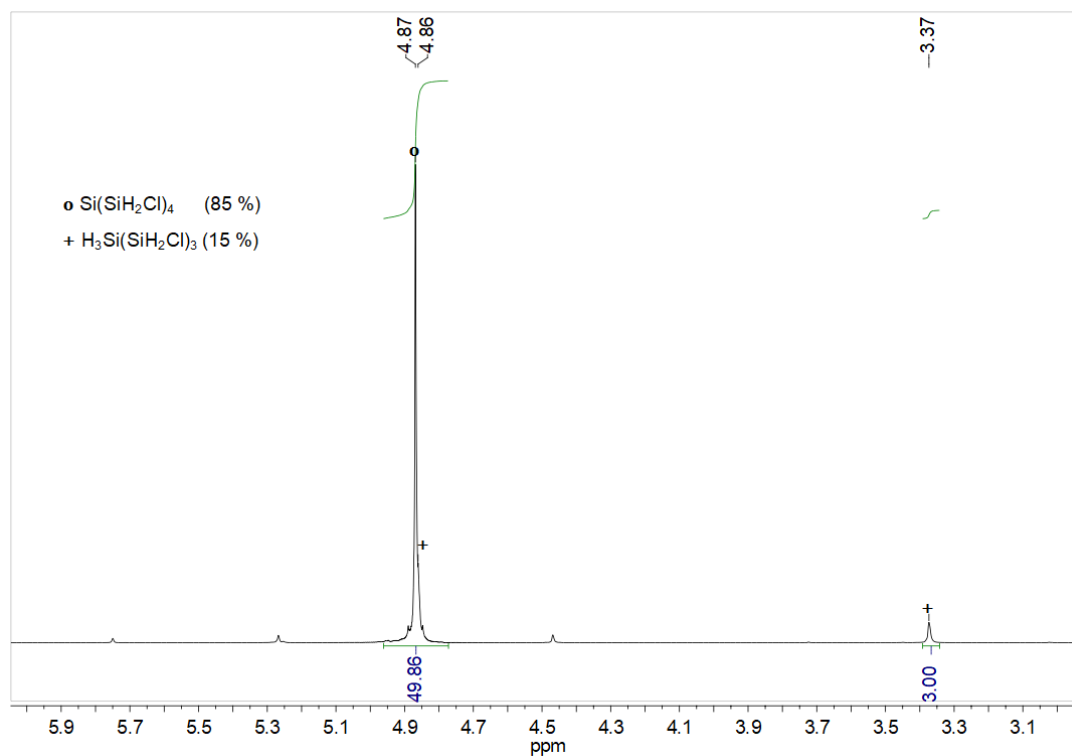

**Figure S2.** bb-decoupled INEPT  $^{29}\text{Si}$ -NMR spectrum (60 MHz,  $\text{C}_6\text{D}_6$  solution) of product mixture obtained after chlorination of  $\text{Si}(\text{SiH}_3)_4$  with  $\text{HCl}/\text{AlCl}_3$  (volatile fraction obtained after recondensation of crude product at  $80^\circ\text{C}$  and 0.01 mbar).

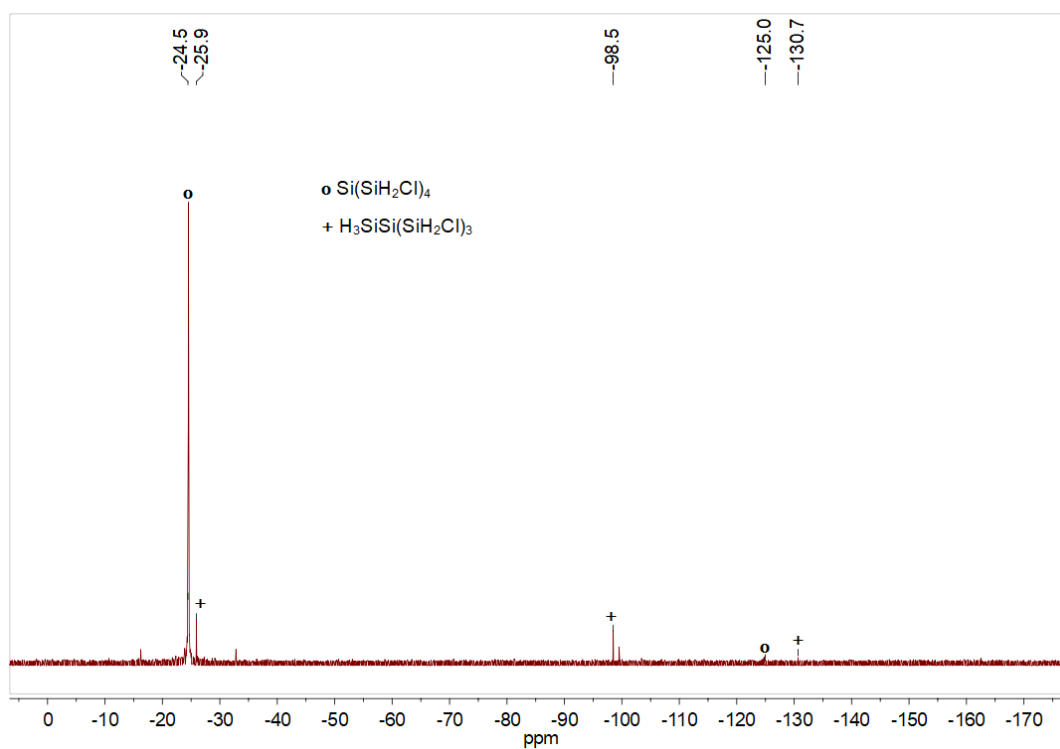

## 2.2. Partial Hydrogenation of Hexachlorodisilane with *i*Bu<sub>2</sub>AlH

19.8 mL (110.0 mmol, 3.0 equiv.) of neat *i*Bu<sub>2</sub>AlH were slowly added to 10.0 g (37.0 mmol, 1.0 equiv.) of Si<sub>2</sub>Cl<sub>6</sub> at 0°C. The resulting mixture was allowed to warm to room temperature and stirred overnight. Subsequently the volatile components were separated by trap to trap distillation at room temperature and 0.01 mbar to give 4.5 g (70 %) of a clear and colorless liquid. NMR analysis of the volatile fraction showed the formation of H<sub>3</sub>SiSiCl<sub>3</sub> (**4**, 55 %), H<sub>2</sub>ClSiSiCl<sub>3</sub> (39 %) and H<sub>3</sub>SiSiH<sub>3</sub> (**7**, 6 %) as the major products along with small amounts of other Cl/H-disilanes and *i*Bu<sub>2</sub>AlCl. Relative amounts of the major products were determined by integration of the <sup>1</sup>H-NMR signals.

**Si<sub>2</sub>H<sub>6</sub>**: <sup>1</sup>H NMR: (C<sub>6</sub>D<sub>6</sub>, TMS, ppm): 3.12 (s, SiH<sub>3</sub>, 6H) <sup>29</sup>Si NMR: (C<sub>6</sub>D<sub>6</sub>, TMS, ppm): -101.5 (q, <sup>1</sup>J<sub>SiH</sub> = 192 Hz; SiH<sub>3</sub>)

**H<sub>3</sub>SiSiCl<sub>3</sub>**: <sup>1</sup>H NMR: (C<sub>6</sub>D<sub>6</sub>, TMS, ppm): 3.20 (H<sub>3</sub>SiSiCl, 3H) <sup>29</sup>Si NMR: (C<sub>6</sub>D<sub>6</sub>, TMS, ppm): -84.9 (q, <sup>1</sup>J<sub>SiH</sub> = 216 Hz; SiH<sub>3</sub>), 12.9 (m, SiCl<sub>3</sub>)

**H<sub>2</sub>ClSiSiCl<sub>3</sub>**: <sup>1</sup>H NMR (C<sub>6</sub>D<sub>6</sub>, TMS, ppm): 4.28 (H<sub>2</sub>ClSiSiCl<sub>3</sub>, 2H) <sup>29</sup>Si NMR (C<sub>6</sub>D<sub>6</sub>, TMS, ppm): -32.3 (t, <sup>1</sup>J<sub>SiH</sub> = 248 Hz; SiH<sub>2</sub>Cl), 3.9(m, SiCl<sub>3</sub>)

**Figure S3.** <sup>1</sup>H-NMR spectrum (Si-H region, 300 MHz, C<sub>6</sub>D<sub>6</sub> solution) of product mixture obtained after partial hydrogenation of Si<sub>2</sub>Cl<sub>6</sub> (volatile fraction obtained after recondensation of crude product at 25° C and 0.01 mbar)

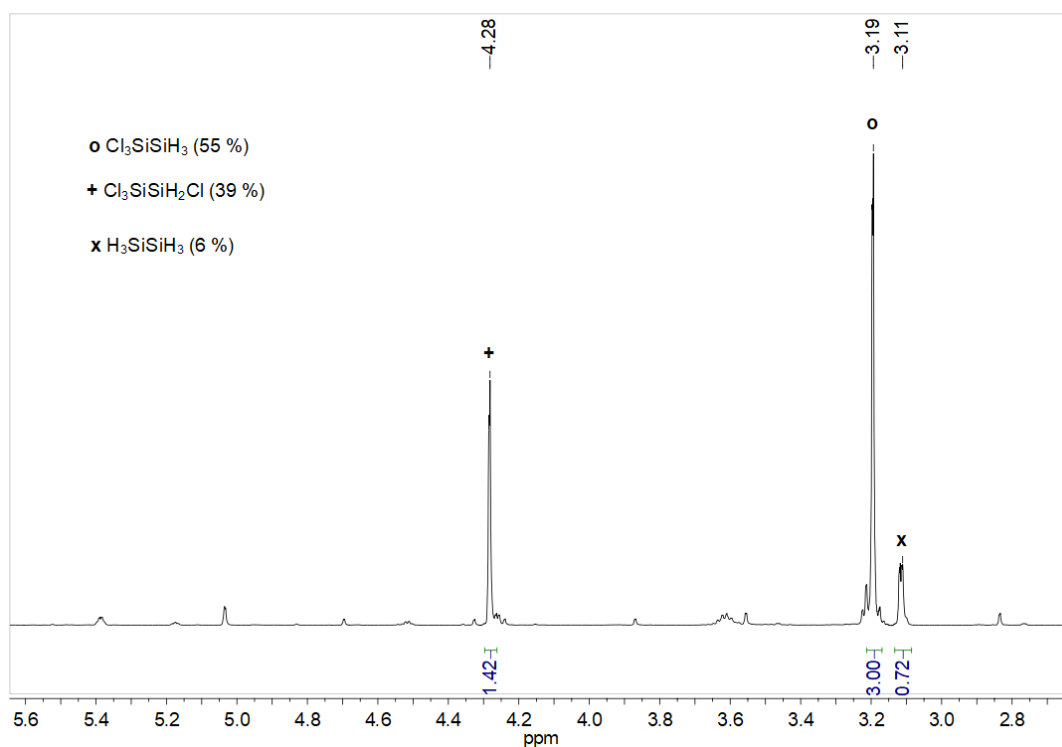

**Figure S4.** H-coupled  $^{29}\text{Si}$ -NMR spectrum (60 MHz,  $\text{C}_6\text{D}_6$  solution) of product mixture obtained after partial hydrogenation of  $\text{Si}_2\text{Cl}_6$  (volatile fraction obtained after recondensation of crude product at  $25^\circ\text{C}$  and 0.01 mbar)

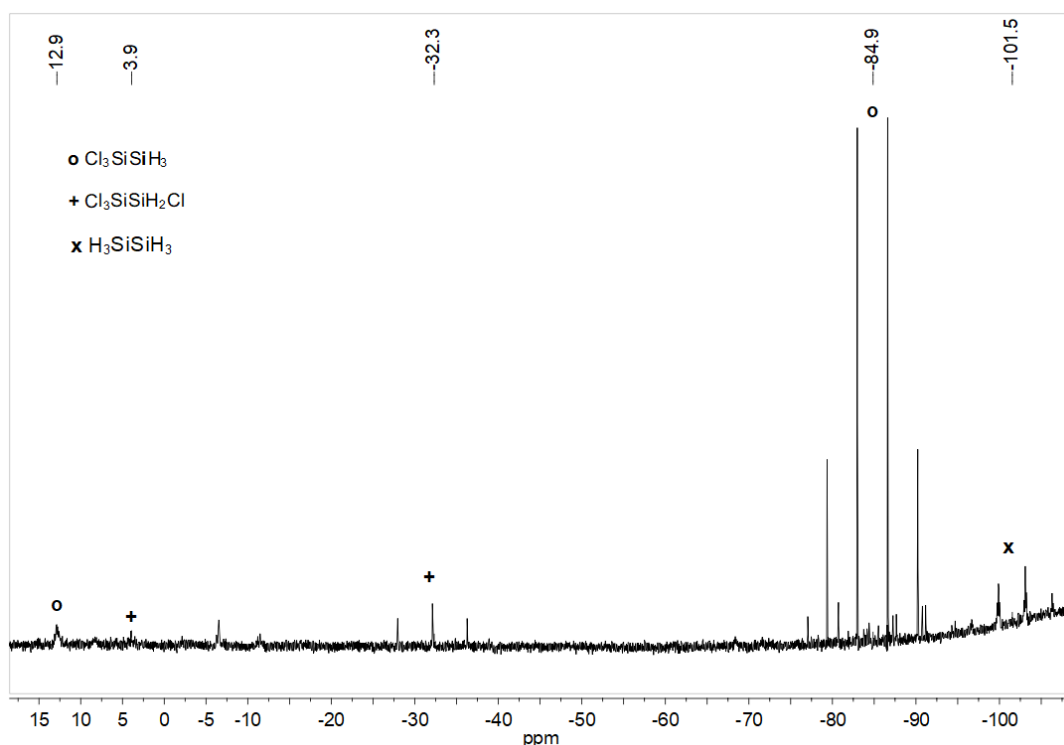

### 2.3. Partial Hydrogenation of Octachlorotrisilane with $i\text{Bu}_2\text{AlH}$

24.5 mL (135.0 mmol, 5 equiv.) of neat  $i\text{Bu}_2\text{AlH}$  were slowly added to 10.0 g (27.0 mmol, 1.0 equiv.) of  $\text{Si}_3\text{Cl}_8$  at  $0^\circ\text{C}$ . The resulting mixture was allowed to warm to room temperature and stirred overnight. Subsequently the volatile components were separated by trap to trap distillation at room temperature and 0.01 mbar to give 2.4 g of a clear and colorless liquid. NMR analysis of the volatile fraction showed the formation of a 2 : 1 mixture of  $\text{H}_3\text{SiSiH}_2\text{SiCl}_3$  (**5**) and  $\text{Si}_3\text{H}_8$  as the major products along with small amounts of other Cl/H-silanes and  $i\text{Bu}_2\text{AlCl}$ . Relative amounts of the major products were determined by integration of the  $^1\text{H}$ -NMR signals. Addition of further 12 mL (67.5 mmol, 2.5 equiv.) of  $i\text{Bu}_2\text{AlH}$  to the higher boiling residue obtained after trap to trap distillation afforded additional 0.6 g of  $\text{Si}_3\text{H}_8$  which means a more or less quantitative conversion of the starting material to chlorohydrotrisilanes.

**$\text{H}_3\text{SiSiH}_2\text{SiH}_3$ :**<sup>5</sup>  $^1\text{H}$  NMR ( $\text{C}_6\text{D}_6$ , TMS, ppm): 3.45 (m,  $\text{SiH}_2(\text{SiH}_3)_2$ , 2H), 3.63 (t,  $\text{SiH}_3$ , 6H);  $^{29}\text{Si}$  NMR ( $\text{C}_6\text{D}_6$ , TMS, ppm): -99.8 (q,  $^1\text{J}_{\text{Si-H}} = 199$  Hz,  $\text{SiH}_3$ ), -115.3 (t,  $^1\text{J}_{\text{Si-H}} = 193$  Hz,  $\text{SiH}_2(\text{SiH}_3)_2$ )

**$\text{H}_3\text{SiSiH}_2\text{SiCl}_3$ :**<sup>6</sup>  $^1\text{H}$  NMR ( $\text{C}_6\text{D}_6$ , TMS, ppm): 3.74 (t,  $\text{SiH}_3$ , 3H), 3.93 (q,  $\text{SiH}_2$ , 2H);  $^{29}\text{Si}$  NMR ( $\text{C}_6\text{D}_6$ , TMS, ppm): -99.8 (q,  $^1\text{J}_{\text{Si-H}} = 207.6$  Hz, t,  $^2\text{J}_{\text{Si-H}} = 3.4$  Hz,  $\text{SiH}_3$ ), -91.1 (t,  $^1\text{J}_{\text{Si-H}} = 206$  Hz, q,  $^2\text{J}_{\text{Si-H}} = 5.2$  Hz,  $\text{SiH}_2$ ), 15.2 (m,  $\text{SiCl}_3$ )

**Figure S5.**  $^1\text{H}$ -NMR spectrum (Si-H region, 300 MHz,  $\text{C}_6\text{D}_6$  solution) of product mixture obtained after partial hydrogenation of  $\text{Si}_3\text{Cl}_8$  (volatile fraction obtained after recondensation of crude product at  $25^\circ\text{C}$  and 0.01 mbar)

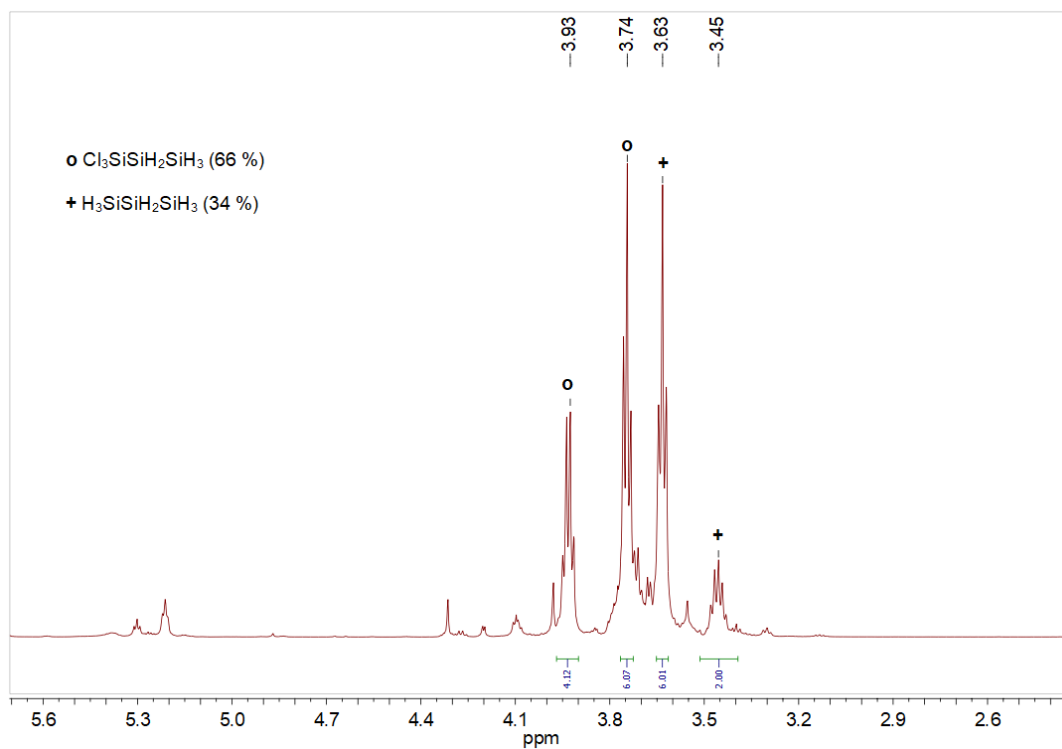

**Figure S6.** H-coupled  $^{29}\text{Si}$ -NMR spectrum (60 MHz,  $\text{C}_6\text{D}_6$  solution) of product mixture obtained after partial hydrogenation of  $\text{Si}_3\text{Cl}_8$  (volatile fraction obtained after recondensation of crude product at  $25^\circ\text{C}$  and 0.01 mbar)

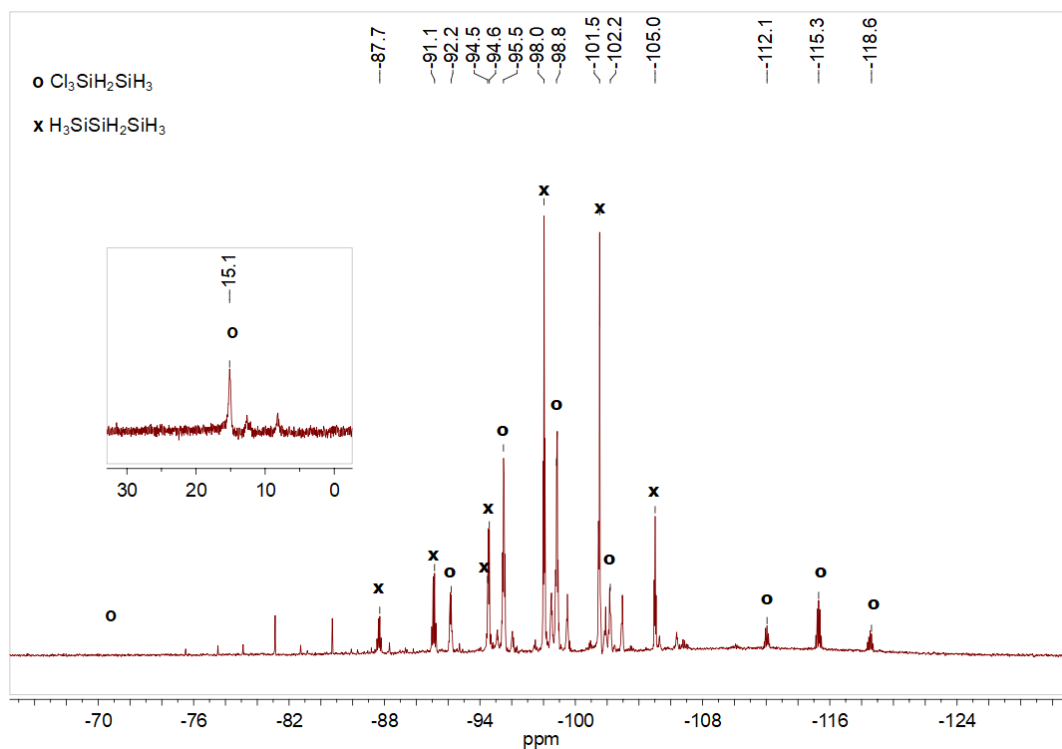

### 2.3 Hydrogenation of Nonachloroisotetrasilane

42.0 mL (222.0 mmol, 6.0 equiv.) of neat  $i\text{Bu}_2\text{AlH}$  were slowly added to 16.0 g (37.0 mmol, 1.0 equiv.) of  $\text{HSi}(\text{SiCl}_3)_3$  at  $0^\circ\text{C}$ . The resulting clear mixture was allowed to warm to room temperature and stirred overnight. Subsequently the volatile components were separated by trap to trap distillation at  $50^\circ\text{C}$  and 0.01 mbar to give 3.2 g of a clear and colorless liquid. NMR analysis of the volatile fraction showed the formation of an approximately 3 : 2 mixture of  $\text{HSi}(\text{SiH}_3)_2\text{SiCl}_3$  (**6**) and  $\text{HSi}(\text{SiH}_3)_3$  as the major products along with small amounts of other Cl/H-silanes and  $i\text{Bu}_2\text{AlCl}$ . Relative amounts of the major products were determined by integration of the  $^1\text{H}$ -NMR signals.

**$\text{HSi}(\text{SiH}_3)_3$** :  $^1\text{H}$  NMR ( $\text{C}_6\text{D}_6$ , TMS, ppm): 3.34 (d,  $\text{SiH}_3$ , 9H), 2.71 (m,  $\text{SiH}$ , 1H).  $^{29}\text{Si}$  NMR ( $\text{C}_6\text{D}_6$ , TMS, ppm): -94.7 (q,  $^1\text{J}_{\text{Si-H}} = 200$  Hz,  $\text{SiH}_3$ ), -137.0 (d,  $^1\text{J}_{\text{Si-H}} = 184$  Hz,  $\text{SiH}$ )

**$\text{HSi}(\text{SiH}_3)_2\text{SiCl}_3$** :  $^1\text{H}$  NMR ( $\text{C}_6\text{D}_6$ , TMS, ppm): 3.26 (d,  $\text{SiH}_3$ , 6H), 3.10 (m,  $\text{SiH}$ , 1H).  $^{29}\text{Si}$  NMR ( $\text{C}_6\text{D}_6$ , TMS, ppm): -106.1 (d,  $^1\text{J}_{\text{Si-H}} = \text{Hz}$ ,  $^2\text{J}_{\text{Si-H}} = 5.5$  Hz  $\text{SiH}$ ), -97.6 (q,  $^1\text{J}_{\text{Si-H}} = 209$  Hz, d,  $^2\text{J}_{\text{Si-H}} = 2.2$  Hz,  $\text{SiH}_3$ )<sup>1</sup>

**Figure S7.**  $^1\text{H}$ -NMR spectrum (SiH region, 300 MHz,  $\text{C}_6\text{D}_6$  solution) of product mixture obtained after partial hydrogenation of  $\text{ClSi}(\text{SiCl}_3)_3$  (volatile fraction obtained after recondensation of crude product at  $50^\circ\text{C}$  and 0.01 mbar)

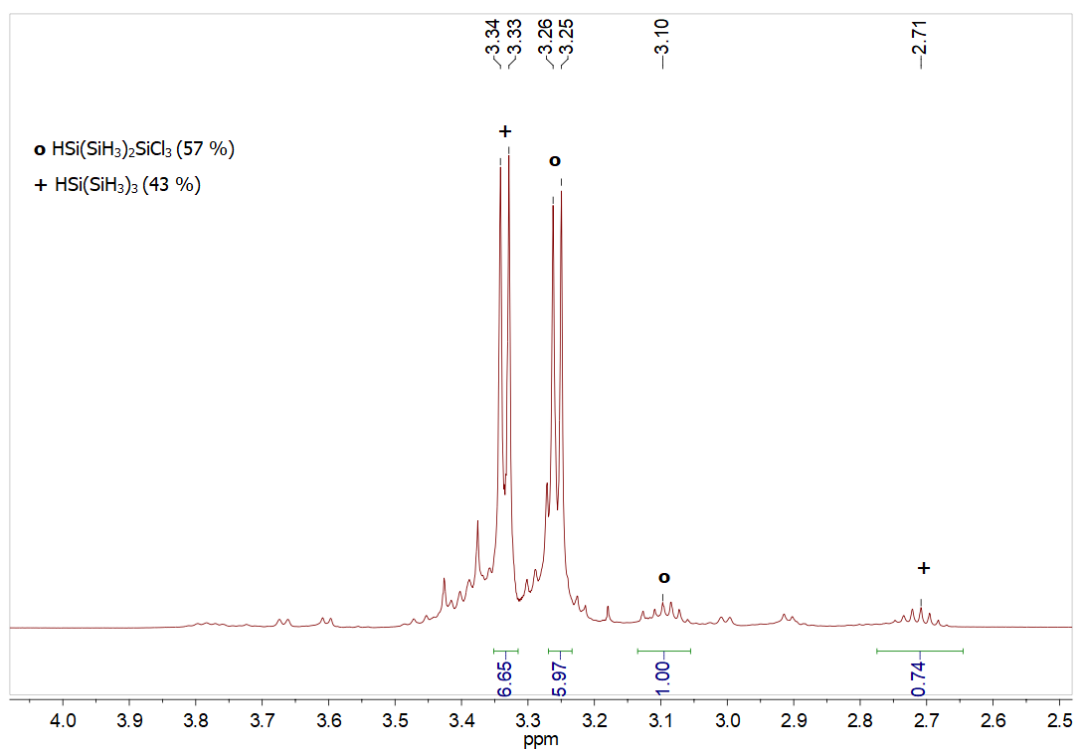

<sup>1</sup>  $\text{SiCl}_3$  resonance not visible for apparative reasons



**Figure S8.** H-coupled  $^{29}\text{Si}$ -NMR spectrum (60 MHz,  $\text{C}_6\text{D}_6$  solution) of product mixture obtained after partial hydrogenation of  $\text{ClSi}(\text{SiCl}_3)_3$  (volatile fraction obtained after recondensation of crude product at  $50^\circ\text{C}$  and 0.01 mbar)

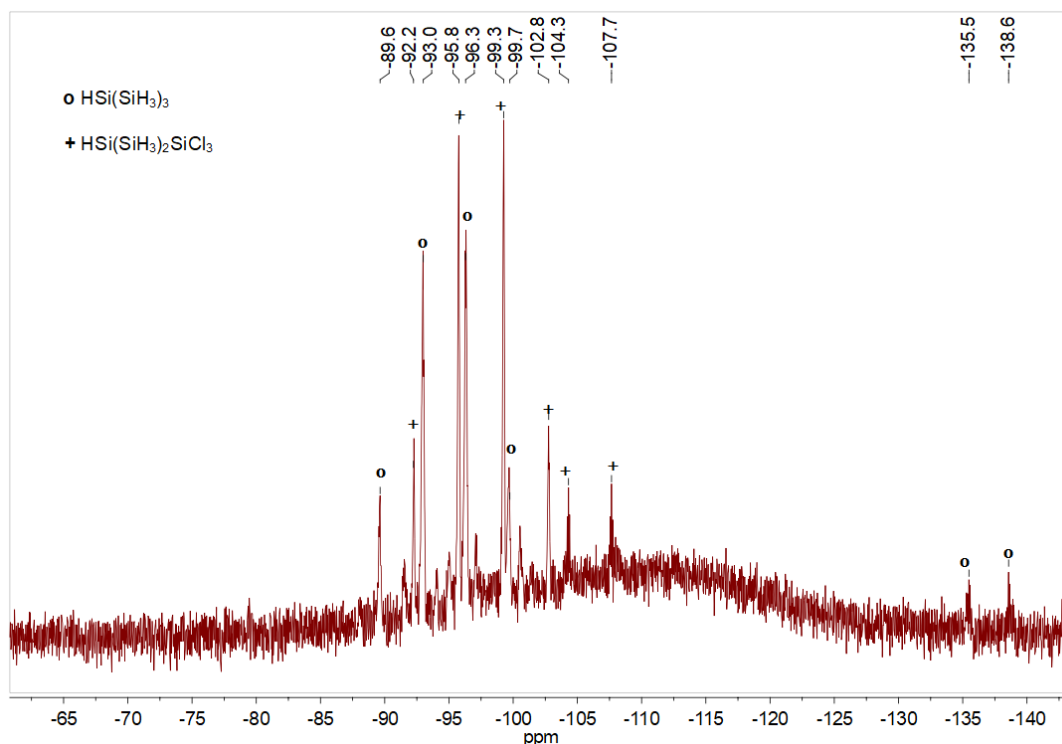

#### 2.4 Hydrogenation of Dodecachloroneopentasilane (DCNPS)

204.0 mL (1145 mmol, 9.0 equiv.) of *i*Bu<sub>2</sub>AlH were slowly added to 72.0 g (127.0 mmol, 1.0 equiv.) of  $\text{Si}(\text{SiCl}_3)_4$  at  $0^\circ\text{C}$ . The resulting clear mixture was allowed to warm to room temperature and stirred overnight. Subsequently 3.6 g of  $\text{Si}(\text{SiH}_3)_4$  containing about 10 % of  $\text{Cl}_3\text{SiSi}(\text{SiH}_3)_3$  (**7**) were separated by trap-to-trap distillation at  $50^\circ\text{C}$  and 0.01 mbar. Further trap-to-trap distillation of the resulting higher boiling residue at  $80^\circ\text{C}$  and 0.01 mbar gave additional 11.7 g of a 1 : 2 mixture of  $\text{Si}(\text{SiH}_3)_4$ <sup>5</sup> and  $\text{Cl}_3\text{SiSi}(\text{SiH}_3)_3$  (**7**) (fraction 2). 5.6 g (yield 20 %) of **7** contaminated with  $\text{Si}(\text{SiH}_3)_4$  and traces of *i*BuAlCl, finally could be isolated from fraction 2 by fractional distillation over a 10 cm Vigreux column at 0.05 mbar mbar.

**$\text{Si}(\text{SiH}_3)_4$** <sup>5</sup>  $^1\text{H}$  NMR ( $\text{C}_6\text{D}_6$ , TMS, ppm): 3.43 (s,  $\text{SiH}_3$ , 6H)  $^{29}\text{Si}$  NMR ( $\text{C}_6\text{D}_6$ , TMS, ppm): -166.0 (*Si*Si<sub>4</sub>), -89.8 (*Si*H<sub>3</sub>).

**$\text{Cl}_3\text{SiSi}(\text{SiH}_3)_3$** <sup>7</sup>  $^1\text{H}$  NMR ( $\text{C}_6\text{D}_6$ , TMS, ppm): 3.37 (s,  $\text{SiH}_3$ , 9H).  $^{29}\text{Si}$  NMR ( $\text{C}_6\text{D}_6$ , TMS, ppm): -128.1 (*Si*( $\text{SiH}_3$ )<sub>3</sub>), -93.3 (*Si*H<sub>3</sub>), 20.2 (*Si*Cl<sub>3</sub>)

**Figure S9.**  $^1\text{H}$ -NMR spectrum (SiH region, 300 MHz,  $\text{C}_6\text{D}_6$  solution) of product mixture obtained after partial hydrogenation of  $\text{Si}(\text{SiCl}_3)_4$  (volatile fraction obtained after recondensation of crude product at  $50^\circ\text{C}$  and 0.01 mbar) (fraction 1)

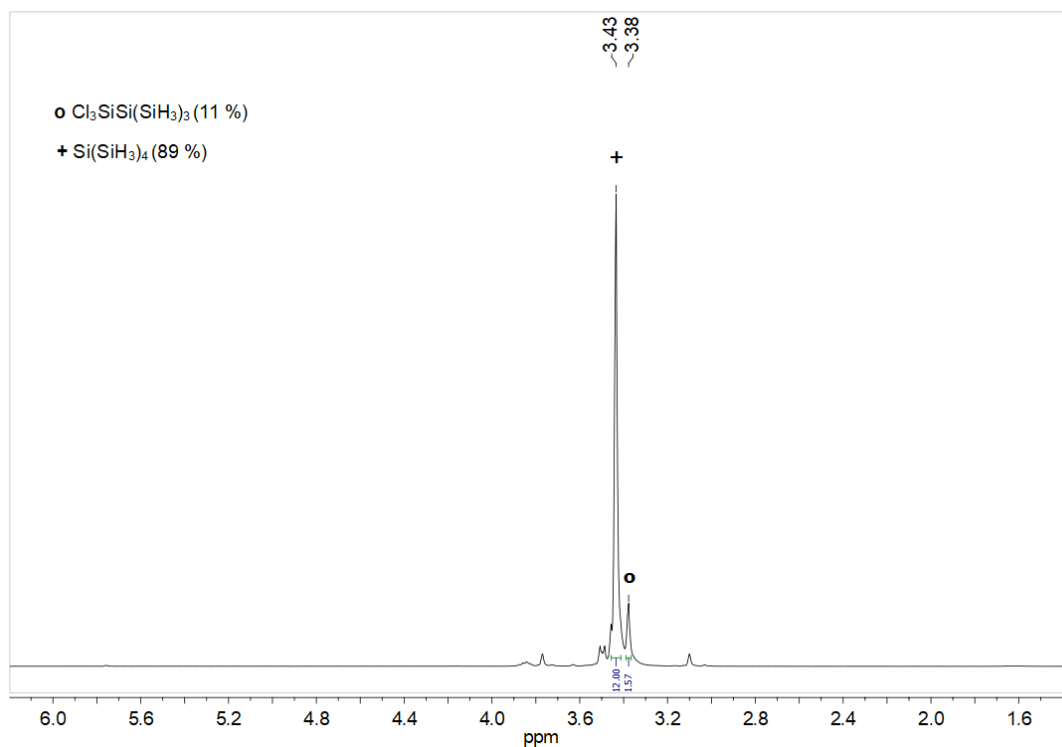

**Figure S10.**  $^1\text{H}$ -NMR spectrum (SiH region, 300 MHz,  $\text{C}_6\text{D}_6$  solution) of product mixture obtained after partial hydrogenation of  $\text{Si}(\text{SiCl}_3)_4$  (volatile fraction obtained after recondensation of crude product at  $80^\circ\text{C}$  and 0.01 mbar) (fraction 2)

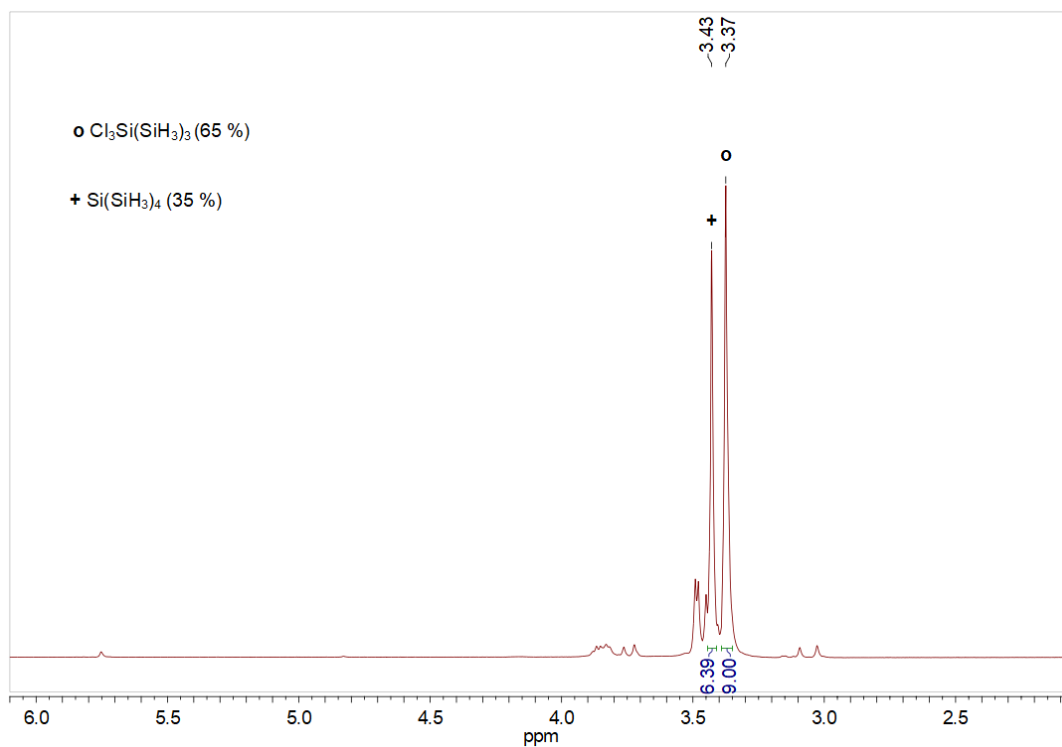

**Figure S11.**  $^1\text{H}$ -NMR spectrum (SiH region, 300 MHz,  $\text{C}_6\text{D}_6$  solution) of **7** obtained by distillation of fraction 2 over a 10 cm Vigreux column at 0.05 mbar

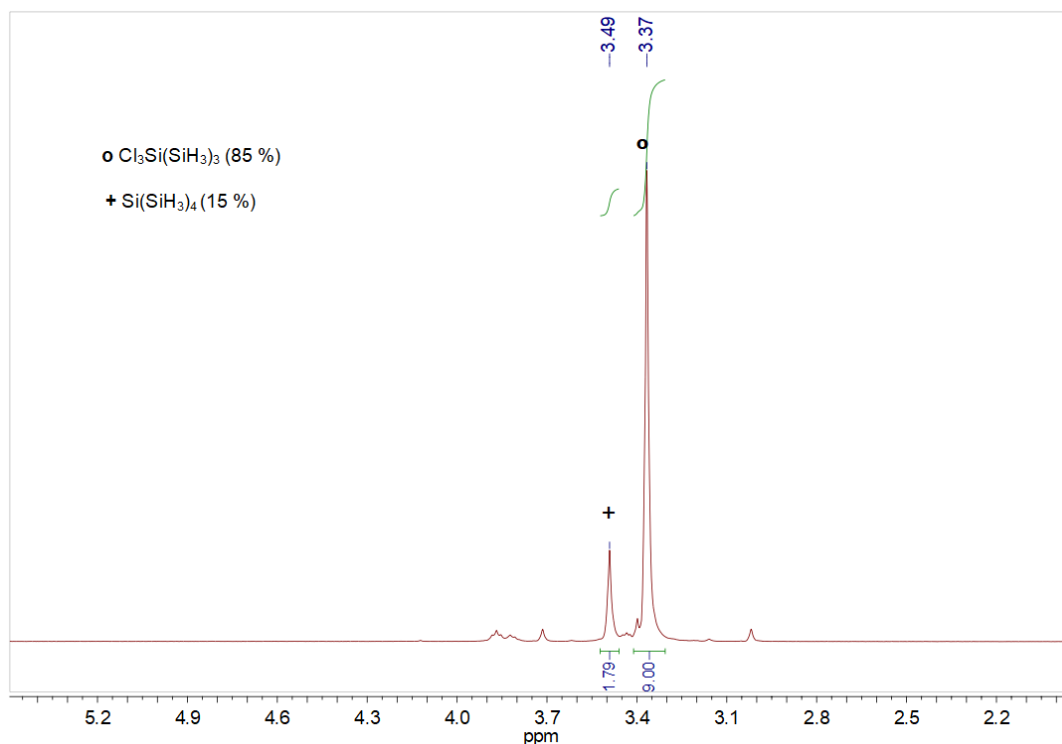

### 3. Calculations

#### 3.1. Computational Methods

All computational studies were conducted using the Gaussian09 software package.<sup>8</sup> Geometry optimizations of all structures (local minima (LMs) and transition states (TSs)) were performed with M06-2X-D3 as hybrid meta exchange-correlation functional<sup>9</sup> with empirical dispersion<sup>10</sup> together with the aug-cc-pVTZ basis set of Dunning *et al.* for all atoms.<sup>11</sup> Solvent effects were considered by using the self-consistent reaction field (SCRF) method and Solvation Model based on Density (SMD)<sup>12</sup> for pentane with a dielectric constant  $\epsilon = 1.84$ .<sup>13</sup> The connectivity of TS structures was confirmed by intrinsic reaction coordinate (IRC) analyses at the same computational level.<sup>14</sup> All stationary points (LMs and TSs) were characterized by harmonic frequency calculations, yielding none or one imaginary frequency, respectively. Single-point energy calculations were carried out on the same level of theory (SMD(*n*-pentane) M06-2X-D3/aug-cc-pVTZ). The relative Gibbs free energies ( $\Delta\Delta G^0$ ) at 298.15 K and 1 atm are reported in  $\text{kcal}\cdot\text{mol}^{-1}$ . All computed structures were visualized using the Gabedit software package.<sup>15</sup>

### 3.2. Computed Reaction Profiles

#### 1. Reduction Step

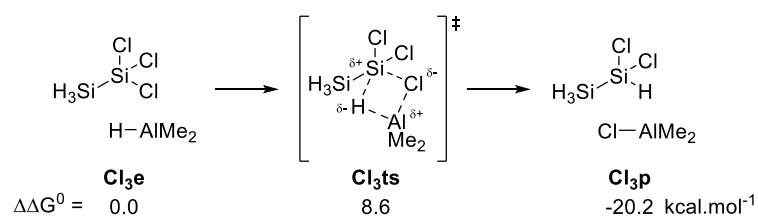

#### 2. Reduction Step

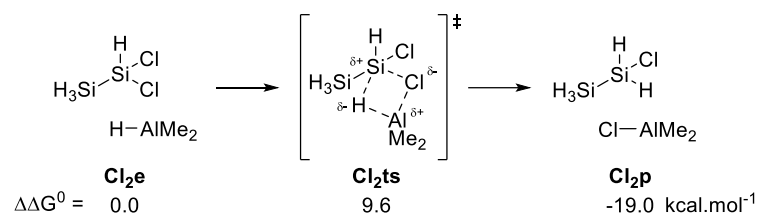

#### 3. Reduction Step

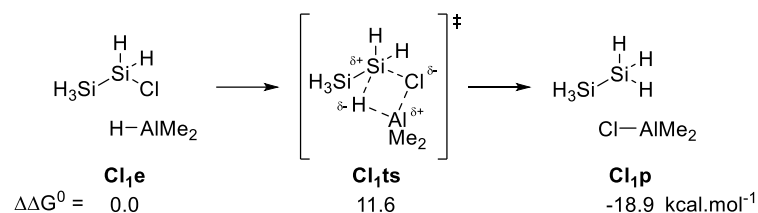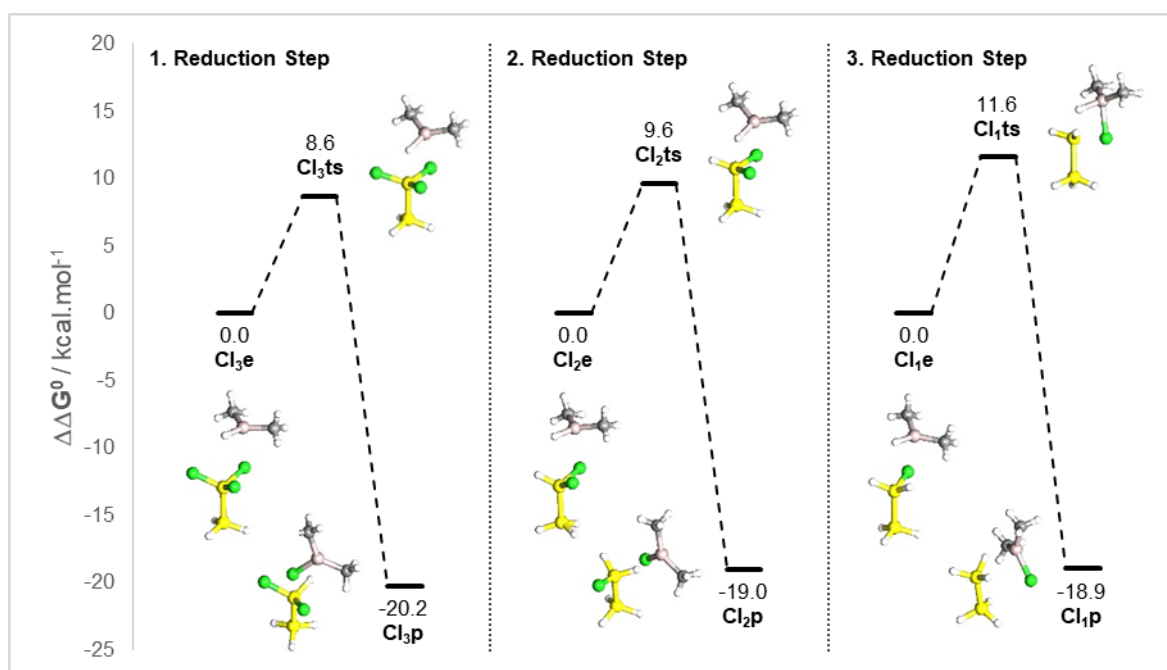

**Figure S12.** Computed reaction profiles for the three reduction steps of  $\text{H}_3\text{SiSiCl}_3$  with  $\text{HAlMe}_2$  at the SMD(pentane) M06-2X-D3/aug-cc-pVTZ level of theory. Relative free energies  $\Delta\Delta G^0$  are in relation to the starting point of each partial reduction.

**Optimized Cartesian Coordinates and Zero Point Vibrational Energy Corrected Absolute Energy in Hartree of Cl<sub>3</sub>p (Calculated with SMD(pentane) M06-2X-D3/aug-cc-pVTZ):**

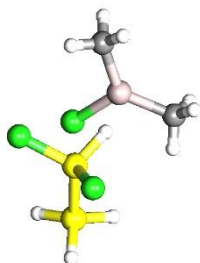

E = -2284.312206 a.u. (0 imaginary frequencies)

|    |           |           |           |    |           |           |           |
|----|-----------|-----------|-----------|----|-----------|-----------|-----------|
| C  | 2.209970  | 1.531636  | -1.527870 | H  | 0.159361  | 0.839913  | 0.524287  |
| Al | 0.296449  | 1.809188  | -1.395258 | H  | 2.587997  | 1.909314  | -2.481533 |
| C  | -0.669698 | 3.376663  | -0.797402 | H  | 2.758367  | 2.045571  | -0.736408 |
| Cl | -0.889944 | 0.276805  | -2.334035 | H  | 2.462874  | 0.470516  | -1.485330 |
| Si | -0.517744 | -0.391207 | 1.031040  | H  | -0.860609 | 4.060076  | -1.628524 |
| Si | -0.065831 | -2.350719 | -0.171663 | H  | -1.640000 | 3.104768  | -0.378095 |
| H  | -1.218227 | -2.677842 | -1.028096 | H  | -0.115443 | 3.933018  | -0.039301 |
| H  | 1.157299  | -2.112685 | -0.962309 | Cl | 0.201155  | -0.538304 | 2.961623  |
| H  | 0.167504  | -3.410549 | 0.831149  | Cl | -2.517347 | 0.077005  | 1.125048  |

**Optimized Cartesian Coordinates and Zero Point Vibrational Energy Corrected Absolute Energy in Hartree of Cl<sub>2</sub>e (Calculated with SMD(pentane) M06-2X-D3/aug-cc-pVTZ):**

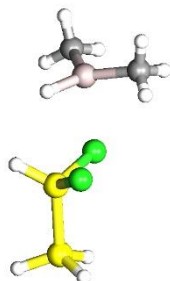

E = -1824.605239 a.u. (0 imaginary frequencies)

|    |           |           |           |   |           |           |           |
|----|-----------|-----------|-----------|---|-----------|-----------|-----------|
| C  | 0.925292  | 2.545932  | 1.822324  | H | -0.204270 | -3.709043 | 0.678967  |
| Al | 0.751241  | 2.356588  | -0.115905 | H | -0.707626 | 2.182813  | -0.735683 |
| C  | 2.212743  | 2.852064  | -1.319724 | H | 1.925490  | 2.277768  | 2.170595  |
| Cl | 1.143179  | -0.272136 | -0.241081 | H | 0.747436  | 3.579470  | 2.133548  |
| Si | -0.837489 | -0.930994 | -0.563988 | H | 0.208231  | 1.924821  | 2.363030  |
| Cl | -1.951544 | -0.324180 | 1.054017  | H | 3.188840  | 2.565244  | -0.921453 |
| Si | -0.749411 | -3.265271 | -0.618633 | H | 2.107600  | 2.391983  | -2.304576 |
| H  | -2.120723 | -3.775968 | -0.814784 | H | 2.241255  | 3.934053  | -1.477654 |
| H  | 0.129546  | -3.683972 | -1.728989 | H | -1.299728 | -0.212454 | -1.756455 |

**Optimized Cartesian Coordinates and Zero Point Vibrational Energy Corrected Absolute Energy in Hartree of Cl<sub>2</sub>ts (Calculated with SMD(pentane) M06-2X-D3/aug-cc-pVTZ):**

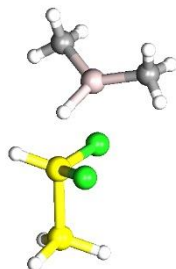

E = -1824.593654 a.u. (1 imaginary frequency)

|    |          |          |           |   |          |          |           |
|----|----------|----------|-----------|---|----------|----------|-----------|
| C  | 4.125509 | 6.108596 | -1.872105 | H | 2.658140 | 0.315823 | -3.012546 |
| Al | 3.864374 | 5.706944 | -3.756243 | H | 2.386986 | 5.091433 | -4.107550 |
| C  | 4.731579 | 6.558637 | -5.275487 | H | 5.186261 | 6.111086 | -1.609682 |
| Cl | 4.385901 | 3.340631 | -3.970583 | H | 3.730210 | 7.093888 | -1.613924 |
| Si | 2.210573 | 3.177247 | -4.290498 | H | 3.627807 | 5.379398 | -1.230280 |
| Cl | 0.943781 | 3.506445 | -2.667688 | H | 5.816137 | 6.587618 | -5.145717 |
| Si | 2.187217 | 0.825827 | -4.319316 | H | 4.525980 | 6.034893 | -6.210917 |
| H  | 0.807608 | 0.350784 | -4.567358 | H | 4.396749 | 7.591129 | -5.399974 |
| H  | 3.078182 | 0.322088 | -5.390315 | H | 1.798322 | 3.674709 | -5.613614 |

**Optimized Cartesian Coordinates and Zero Point Vibrational Energy Corrected Absolute Energy in Hartree of Cl<sub>2</sub>p (Calculated with SMD(pentane) M06-2X-D3/aug-cc-pVTZ):**

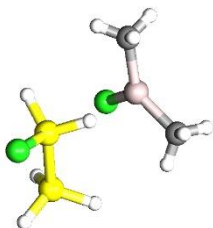

E = -1824.636928 a.u. (0 imaginary frequencies)

|    |           |           |           |   |           |           |           |
|----|-----------|-----------|-----------|---|-----------|-----------|-----------|
| C  | 1.450123  | 1.533530  | 1.794327  | H | 0.026537  | -1.957859 | 1.356584  |
| Al | 1.441335  | 1.438706  | -0.142010 | H | -0.542441 | 0.914820  | -0.261705 |
| C  | 1.373433  | 2.885201  | -1.429936 | H | 2.464173  | 1.700821  | 2.166124  |
| Cl | 2.071599  | -0.465633 | -0.953925 | H | 0.829026  | 2.349106  | 2.168945  |
| Si | -1.174676 | -0.245987 | -0.983074 | H | 1.095882  | 0.603193  | 2.242205  |
| Cl | -3.201262 | 0.198720  | -0.837555 | H | 2.365643  | 3.320189  | -1.575308 |
| Si | -0.699029 | -2.265278 | 0.107777  | H | 1.028975  | 2.539316  | -2.406093 |
| H  | -1.987310 | -2.920276 | 0.416604  | H | 0.713233  | 3.690858  | -1.103303 |
| H  | 0.113678  | -3.123307 | -0.774061 | H | -0.793779 | -0.125392 | -2.398322 |



**Optimized Cartesian Coordinates and Zero Point Vibrational Energy Corrected Absolute Energy in Hartree of Cl<sub>2</sub>e (Calculated with SMD(pentane) M06-2X-D3/aug-cc-pVTZ):**

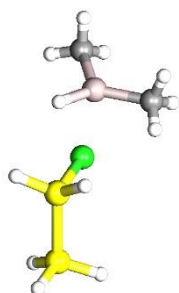

E = -1364.929790 a.u. (0 imaginary frequencies)

|    |           |           |           |   |           |           |           |
|----|-----------|-----------|-----------|---|-----------|-----------|-----------|
| C  | 2.316073  | 1.885938  | -0.374747 | H | 0.073087  | 1.851837  | 1.687530  |
| Al | 0.466433  | 2.212820  | 0.182526  | H | 2.395179  | 1.787139  | -1.460273 |
| C  | -0.684050 | 3.437869  | -0.819674 | H | 2.970093  | 2.713059  | -0.084135 |
| Cl | -0.547181 | -0.025891 | -0.676528 | H | 2.735570  | 0.980270  | 0.069312  |
| Si | -0.339805 | -1.132019 | 1.130753  | H | -0.549895 | 3.332774  | -1.899015 |
| Si | -0.704613 | -3.362750 | 0.527752  | H | -1.742426 | 3.282902  | -0.600342 |
| H  | -2.031013 | -3.470839 | -0.112638 | H | -0.457217 | 4.479261  | -0.573984 |
| H  | 0.351194  | -3.781580 | -0.415776 | H | 1.027296  | -0.847885 | 1.596915  |
| H  | -0.658882 | -4.201958 | 1.743903  | H | -1.348782 | -0.577434 | 2.046892  |

**Optimized Cartesian Coordinates and Zero Point Vibrational Energy Corrected Absolute Energy in Hartree of Cl<sub>2</sub>ts (Calculated with SMD(pentane) M06-2X-D3/aug-cc-pVTZ):**

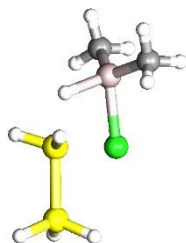

E = -1364.914946 a.u. (1 imaginary frequency)

|    |          |           |           |   |          |          |           |
|----|----------|-----------|-----------|---|----------|----------|-----------|
| C  | 6.156770 | 5.654670  | -4.583623 | H | 3.948374 | 4.683748 | -2.832830 |
| Al | 4.247427 | 5.526061  | -4.236812 | H | 6.350698 | 5.823706 | -5.645884 |
| Cl | 3.522631 | 3.484970  | -5.135761 | H | 6.618883 | 6.481295 | -4.039510 |
| Si | 3.552626 | 2.941247  | -2.856753 | H | 6.682236 | 4.740769 | -4.298865 |
| Si | 2.940298 | 0.739269  | -3.456753 | H | 2.851300 | 7.109689 | -5.656776 |
| H  | 1.636309 | 0.719581  | -4.158324 | H | 1.886615 | 6.518092 | -4.307888 |
| C  | 2.882152 | 6.863262  | -4.592271 | H | 3.074019 | 7.794269 | -4.054179 |
| H  | 3.960218 | 0.128466  | -4.340269 | H | 4.886076 | 2.813990 | -2.227749 |
| H  | 2.828064 | -0.080159 | -2.224202 | H | 2.470954 | 3.403707 | -1.958208 |

**Optimized Cartesian Coordinates and Zero Point Vibrational Energy Corrected Absolute Energy in Hartree of Cl<sub>1</sub>p (Calculated with SMD(pentane) M06-2X-D3/aug-cc-pVTZ):**

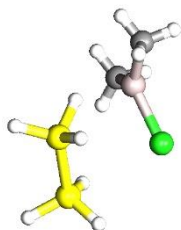

E = -1364.961283 a.u. (0 imaginary frequencies)

|    |           |           |           |   |           |           |           |
|----|-----------|-----------|-----------|---|-----------|-----------|-----------|
| C  | 2.374482  | 2.182569  | -0.185269 | H | 0.360609  | 0.525906  | 1.209437  |
| Al | 0.656303  | 1.385384  | -0.607141 | H | 2.797030  | 2.673720  | -1.065657 |
| Cl | 0.769664  | -0.451298 | -1.734494 | H | 2.301104  | 2.935116  | 0.602143  |
| Si | 0.428606  | -0.907688 | 1.673247  | H | 3.094864  | 1.426963  | 0.134182  |
| Si | -1.266422 | -2.127028 | 0.603012  | H | -1.259814 | 2.737296  | -1.577788 |
| H  | -2.135859 | -1.189904 | -0.136019 | H | -1.891646 | 1.516628  | -0.486037 |
| C  | -1.085918 | 2.240807  | -0.619537 | H | -1.179311 | 2.999255  | 0.160032  |
| H  | -0.675267 | -3.118266 | -0.315312 | H | 1.797187  | -1.365138 | 1.369106  |
| H  | -2.066696 | -2.826119 | 1.633043  | H | 0.243855  | -0.792296 | 3.135356  |

## 4. References

- <sup>1</sup> A. B. Pangborn, M. A. Giardello, R. H. Grubbs, R. K. Rosen, F. J. Timmers, *Organometallics* **1996**, *15*, 1518.
- <sup>2</sup> B. Arkles, Y. Pan, G. L. Larson, US 2012/0071678, May 22, **2012**.
- <sup>3</sup> H. Stueger, T. Mitterfellner, R. Fischer, C. Walkner, M. Patz, S. Wieber *Inorg. Chem.* **2012**, *51*, 6173.
- <sup>4</sup> H. Söllradl, E. Hengge, *J. Organomet. Chem.* **1983**, *243*, 251.
- <sup>5</sup> J. Hahn, *Z. Naturforsch.* **1980**, *35B*, 282.
- <sup>6</sup> J. E. Drake, N. Goddard, N. P. C. Westwood, *J. Chem. Soc. A*, **1971**, 3305.
- <sup>7</sup> M. Haas, V. Christopoulos, J. Radebner, M. Holthausen, T. Lainer, L. Schuh, H. Fitzek, G. Kothleitner, A. Torvisco, R. Fischer, O. Wunnicke, H. Stueger, *Angew. Chem. Int. Ed.* **2017**, *56*, 14071.
- <sup>8</sup> a) Frisch, M. J.; Trucks, G. W.; Schlegel, H. B.; Scuseria, G. E.; Robb, M. A.; Cheeseman, J. R.; Scalmani, G.; Barone, V.; Mennucci, B.; Petersson, G. A.; Nakatsuji, H.; Caricato, M.; Li, X.; Hratchian, H. P.; Izmaylov, A. F.; Bloino, J.; Zheng, G.; Sonnenberg, J. L.; Hada, M.; Ehara, M.; Toyota, K.; Fukuda, R.; Hasegawa, J.; Ishida, M.; Nakajima, T.; Honda, Y.; Kitao, O.; Nakai, H.; Vreven, T.; Montgomery Jr., J. A.; Peralta, J. E.; Ogliaro, F.; Bearpark, M.; Heyd, J. J.; Brothers, E.; Kudin, K. N.; Staroverov, N.; Keith, T. V.; Kobayashi, R.; Normand, J.; Raghavachari, K.; Rendell, A.; Burant, J. C.; Iyengar, S. S.; Tomasi, J.; Cossi, M.; Rega, N.; Millam, J. M.; Klene, M.; Knox, J. E.; Cross, J. B.; Bakken, V.; Adamo, C.; Jaramillo, J.; Gomperts, R.; Stratmann, R. E.; Yazyev, O.; Austin, A. J.; Cammi, R.; Pomelli, C.; Ochterski, J. W.; Martin, R. L.; Morokuma, K.; Zakrzewski, V. G.; Voth, G. A.; Salvador, P.; Dannenberg, J. J.; Dapprich, S.; Daniels, A. D.; Farkas, O.; Foresman, J. B.; Ortiz, J. V.; Cioslowski, J.; Fox, D. J. *Gaussian 09, Revision D.01*; Gaussian, Inc.: Wallingford, CT, **2013**. b) Hariharan, P. C.; Pople, J. A. The Influence of Polarization Functions on Molecular Orbital Hydrogenation Energies. *Theor. Chim. Acta* **1973**, *28*, 213–222. c) Hehre, W. J.; Ditchfield, R.; Pople, J. A. Self-Consistent Molecular Orbital Methods. XII. Further Extensions of Gaussian-Type Basis Sets for Use in Molecular Orbital Studies of Organic Molecules. *J. Chem. Phys.* **1972**, *56*, 2257–2261. d) Ditchfield, R.; Hehre, W. J.; Pople, J. A. Self-Consistent Molecular-Orbital Methods. IX. An Extended Gaussian-Type Basis for Molecular-Orbital Studies of Organic Molecules. *J. Chem. Phys.* **1971**, *54*, 724–728.
- <sup>9</sup> Zhao, Y.; Truhlar, D. G. The M06 Suite of Density Functionals for Main Group Thermochemistry, Thermochemical Kinetics, Noncovalent Interactions, Excited States, and Transition Elements: Two New Functionals and Systematic Testing of Four M06-Class Functionals and 12 Other Functionals. *Theor. Chem. Acc.* **2008**, *120*, 215–241.
- <sup>10</sup> Grimme, S.; Antony, J.; Ehrlich, S.; Krieg, H. A consistent and accurate ab initio parameterization of density functional dispersion correction (DFT-D) for the 94 elements H-Pu. *J. Chem. Phys.* **2010**, *132*, 154104.
- <sup>11</sup> a) Kendall, R.A.; Dunning Jr., T. H.; Harrison, R. J. Electron affinities of the first-row atoms revisited. Systematic basis sets and wave functions. *J. Chem. Phys.* **1992**, *96*, 6796–6806. b) Woon, D. E.; Dunning Jr., T. H. Gaussian-basis sets for use in correlated molecular calculations. 3. The atoms aluminum through argon. *J. Chem. Phys.* **1993**, *98*, 1358–1371.
- <sup>12</sup> Marenich, A. V.; Cramer, C. J.; and D. G. Truhlar, D. G. Universal solvation model based on solute electron density and a continuum model of the solvent defined by the bulk dielectric constant and atomic surface tensions. *J. Phys. Chem. B* **2009**, *113*, 6378–6396.
- <sup>13</sup> Tomasi, J.; Mennucci, B.; Cammi, R. Quantum Mechanical Continuum Solvation Models. *Chem. Rev.* **2005**, *105*, 2999–3093.
- <sup>14</sup> Fukui, K. The path of chemical-reactions – The IRC approach. *Acc. Chem. Res.* **1981**, *14*, 363–368.
- <sup>15</sup> Allouche, A.-R. Gabedit—A Graphical User Interface for Computational Chemistry Softwares. *J. Comput. Chem.* **2011**, *32*, 174–182.
